# Supplementary material for: Nivolumab for advanced melanoma: pretreatment prognostic factors and early outcome markers during therapy
Source: PubMed Central journal article supplement (PMC5363594; doi:10.18632/oncotarget.12677), 2016-10-15
Supplement: oncotarget-07-77404-s001.pdf [file oncotarget-07-77404-s001.pdf]

# Nivolumab for advanced melanoma: pretreatment prognostic factors and early outcome markers during therapy

## SUPPLEMENTARY FIGURE

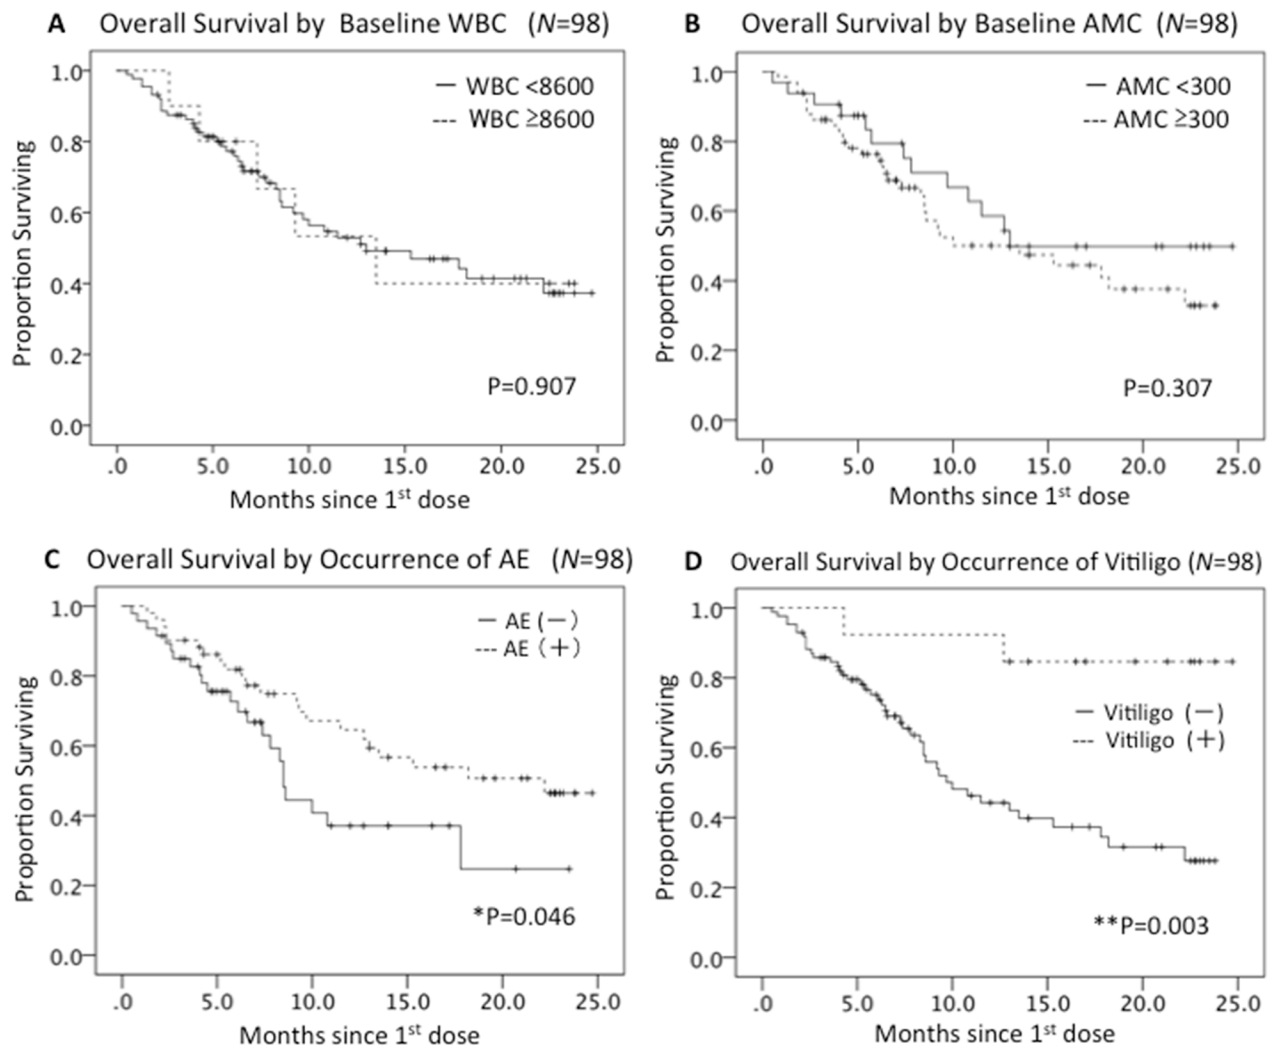

(Continued)

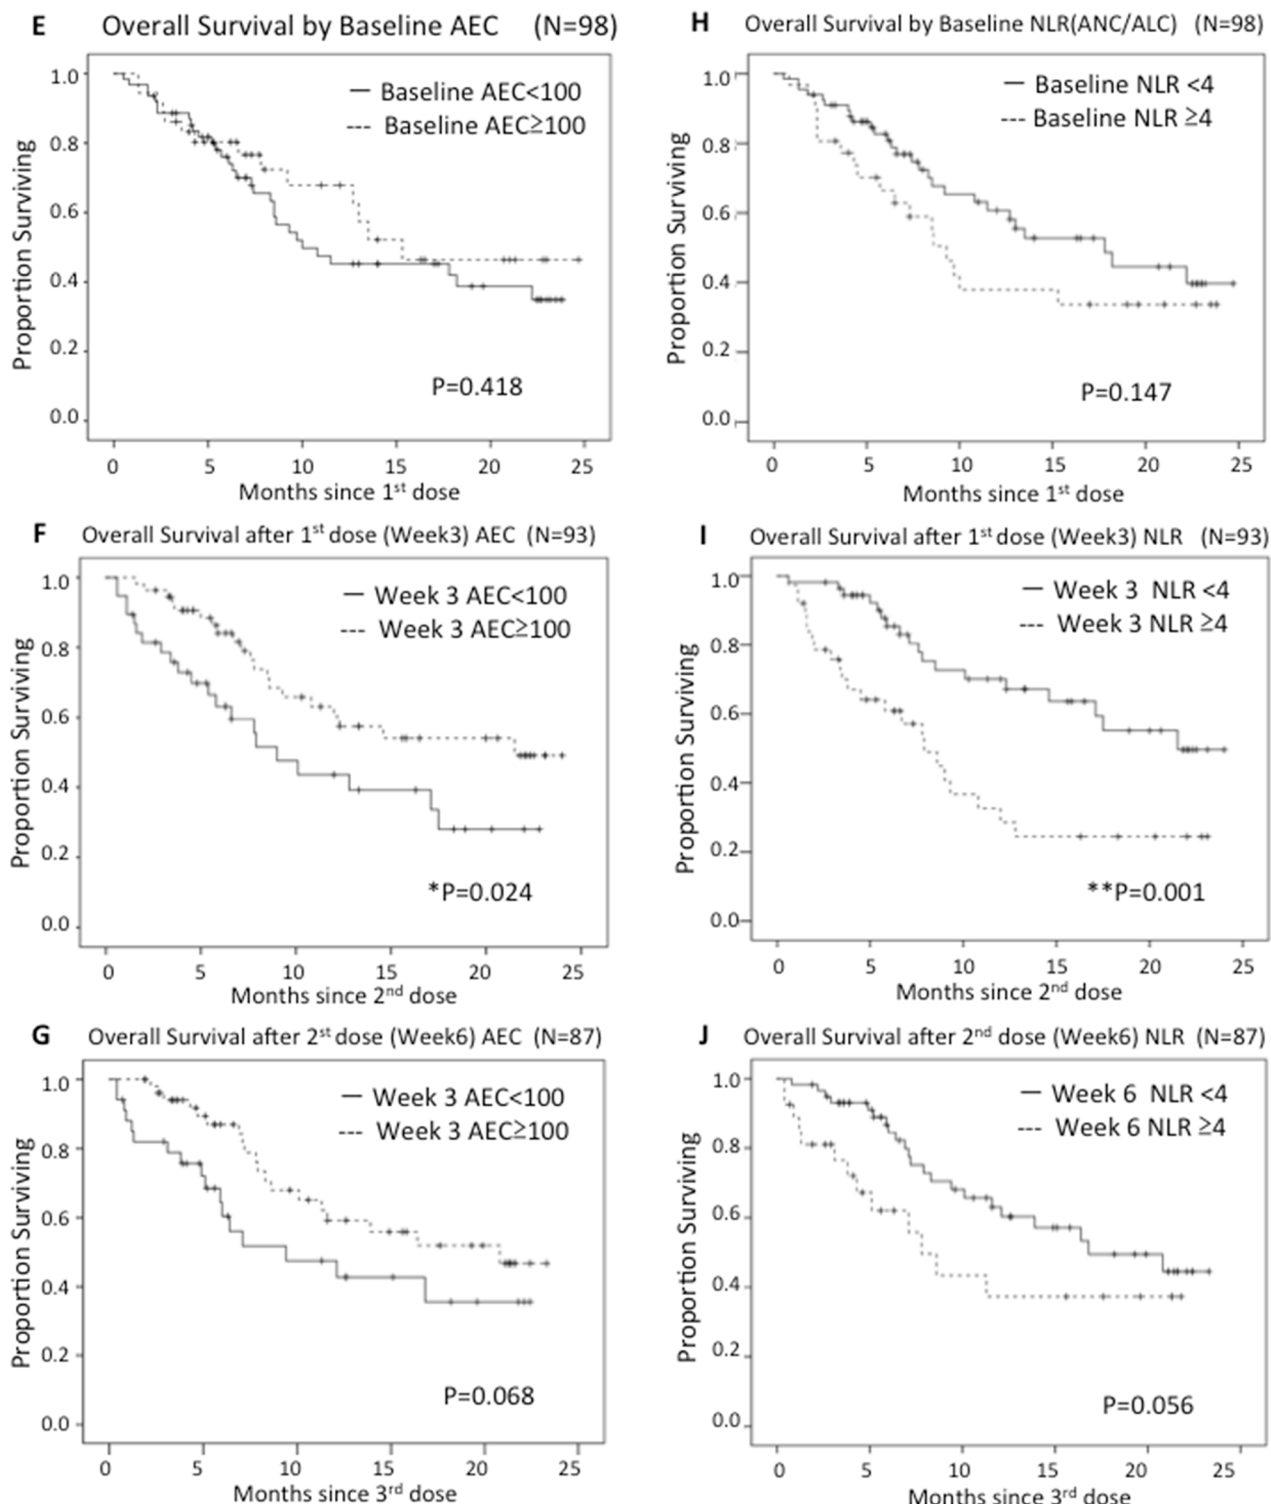

**Supplementary Figure S1: Kaplan-Meier curves in terms of OS by each prognostic factor.** Baseline WBC **A.**, AMC **B.**, AEC **E.**, and NLR **H.** were not associated with OS, significantly. Occurrence of AE **C.** especially vitiligo **D.** was significantly associated with better OS. AEC ≥ 100/μl **F.** and NLR < 4 **I.** at Week 3 were associated with better OS significantly, while there was no significant difference at Week 6 **G.**, **J.**
